# Supplementary material for: The sulfite oxidase Shopper controls neuronal activity by regulating glutamate homeostasis in Drosophila ensheathing glia
Source: PubMed Central journal article supplement (PMC6115356; doi:10.1038/s41467-018-05645-z), 2018-08-29
Supplement: 41467_2018_5645_MOESM1_ESM.pdf [file 41467_2018_5645_MOESM1_ESM.pdf]

**The Sulfite Oxidase Shopper controls neuronal activity by regulating glutamate homeostasis in *Drosophila* ensheathing glia**

Supplementary Information

Nils Otto<sup>1#</sup>, Zvonimir Marelja<sup>\$\$2</sup>, Andreas Schoofs<sup>\$3</sup>, Holger Kranenburg<sup>\$1</sup>, Jonas Bittern<sup>1</sup>, Kerem Yildirim<sup>1</sup>, Dimitri Berh<sup>4</sup>, Maria Bethke<sup>1</sup>, Silke Thomas<sup>1</sup>, Sandra Rode<sup>1</sup>, Benjamin Risse<sup>4</sup>, Xiaoyi Jiang<sup>4</sup>, Michael Pankratz<sup>3</sup>, Silke Leimkühler<sup>2</sup>, Christian Klämbt<sup>\*1</sup>

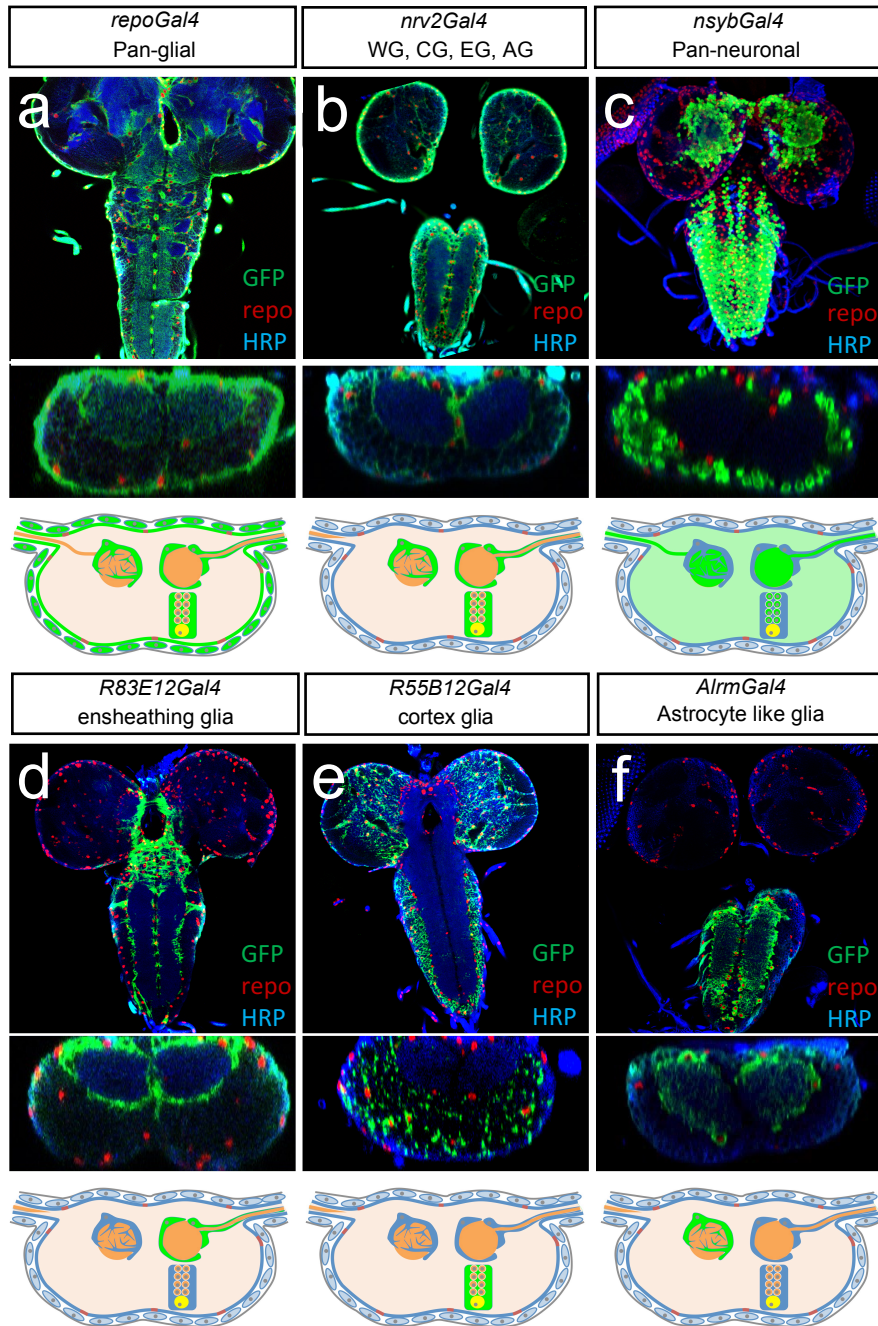

### Supplementary Figure 1 Expression patterns of employed drivers

**a-f** Single confocal sections of third instar larval brains of indicated genotypes stained for GFP (green), the pan-glia nuclear marker Repo (red), and neuronal cell membranes (aHRP, blue). The different glial cells targeted by the respective Gal4 drivers are indicated. The schematic drawing summarizes the expression patterns. For further labeling compare to Fig. 1h. Below each image are representative orthogonal sections of the same brains and schemes indicating the position of targeted cells. **a** *repo-Gal4* directs expression to all glial cells. **b** *nrv2-Gal4* directs expression to wrapping glial cells in the peripheral nervous system (WG), cortex glial cells (CG), ensheathing glial cells (EG), and astrocytes (AG). **c** *nsyb-Gal4* directs expression to all neurons. **d** *R83E12-Gal4* directs expression to ensheathing glial cells exclusively. **e** *R55B12-Gal4* directs expression to cortex glial cells exclusively. **f** *alrm-Gal4* directs expression to astrocytes exclusively. Scale bars are 20  $\mu$ m.

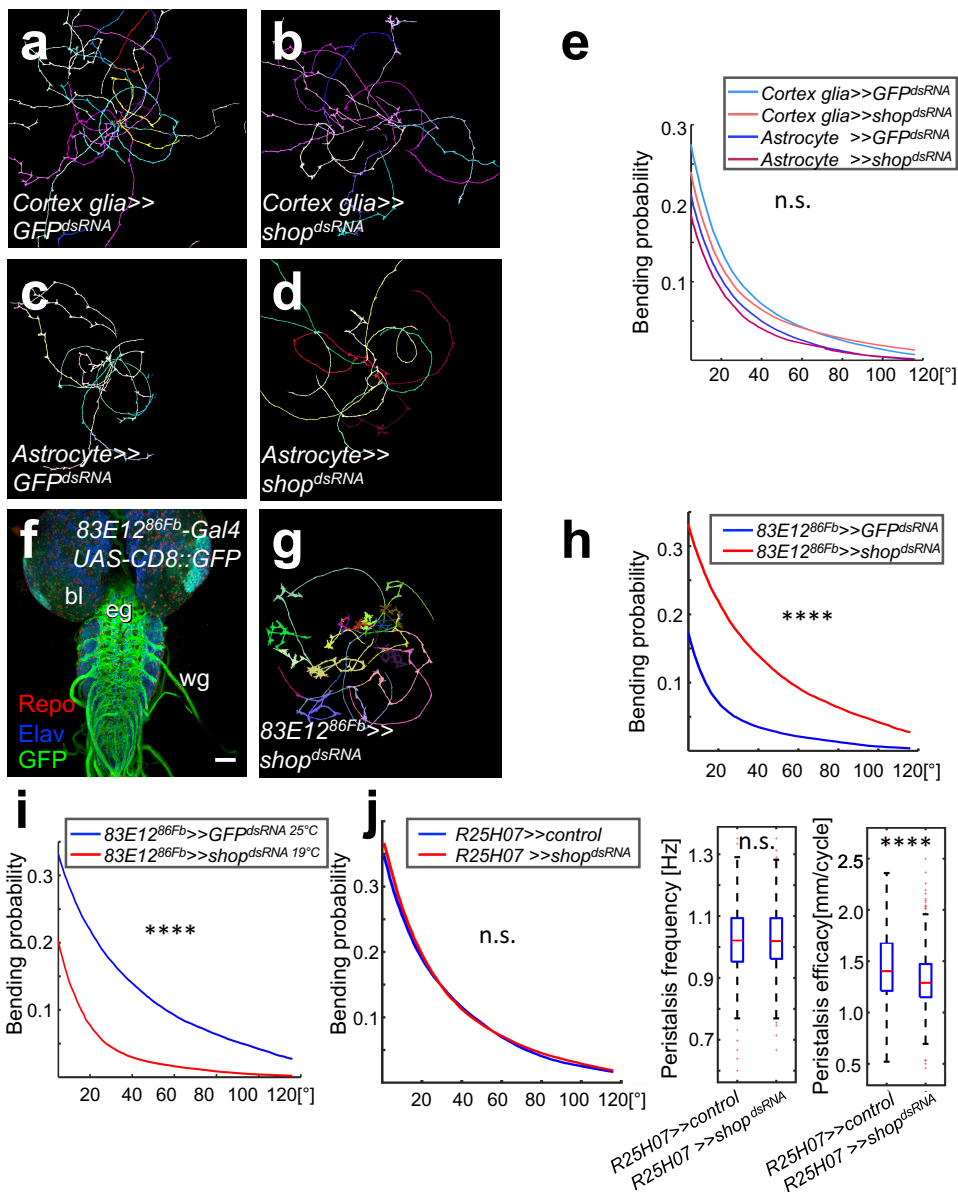

### Supplementary Figure 2 Suppression of *shopper* in astrocytes and cortex glia does not change behavior

Cortex glia (*R55B12-Gal4*) and astrocyte specific suppression (*alm-Gal4* and *R25H07-Gal4*). **a** Control animals of the genotype *UAS-GFP<sup>dsRNA</sup>; R55B12-Gal4* ( $n=253$  trajectories) do not exhibit a different behavior compared to **b** where *shopper* is suppressed ( $n=206$  trajectories). **c** RNAi control animals of the genotype *almGal4; UAS-GFP<sup>dsRNA</sup>; almGal4* ( $n=116$  trajectories) do not exhibit a different behavior than upon **d** suppression of *shopper* ( $n=145$  trajectories). **e** Quantification of bending probability of the genotypes indicated. Suppression of *shopper* neither in cortex glia nor in astrocytes causes locomotion defects like described for ensheathing glia. **f** Antibody staining of a third instar larval brain of the genotype: *R83E12<sup>86Fb</sup>-Gal4, UAS-CD8::GFP*. The expression domain of the *Gal4* driver is comparable to the original *R83E12-Gal4* insertion in the *atp2* site (see Supplementary Figure 1). **g,h** Suppression of *shopper* using *R83E12<sup>86Fb</sup>-Gal4* ( $n=125$  trajectories) increases head bending compared to controls ( $n=87$  trajectories). **i** *shopper* suppression in ensheathing glia results in a stronger phenotype when tested at 25° C ( $n=125$  trajectories) compared to 19°C ( $n=74$  trajectories). **j** Analysis of *shopper* suppression using the astrocyte driver *R25H07-Gal4, UAS-shop<sup>dsRNA</sup>; R25H07-Gal4* animals ( $n=79$  trajectories) compared to *UAS-GFP<sup>dsRNA</sup>; R25H07-Gal4* ( $n=87$  trajectories) do not show increased bending probability. While peristalsis efficacy between these genotypes ( $n=459$  run phases vs. 288 run phases) is reduced, no change in peristalsis frequency can be observed. Scale bars are 20  $\mu$ m. Box plots represent: The first and third quartile, as well as the median. Whiskers contain values within 1.5x of the interquartile range, outliers are red crosses. >600 frames of ~80 larvae; \*\*\*\* $p<0.001$ , n.s.: not significant, Wilcoxon rank-sum Test. See supplementary Table 1 for details.

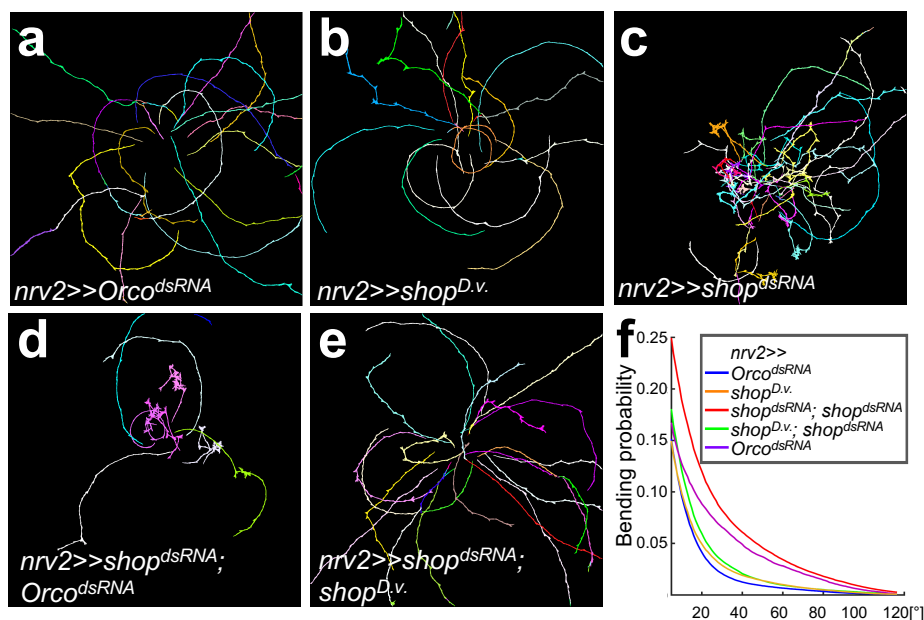

### Supplementary Figure 3 The *shopper* RNAi phenotype can be rescued by an RNAi insensitive interspecies rescue construct

Locomotion features were recorded following expression of different transgenes in ensheathing and cortex glia using *nrv2-Gal4*. **a** RNAi control animals of the genotype *nrv2-Gal4*, *UAS-Orco<sup>dsRNA</sup>*; *nrv2-Gal4*. *Orco* is not expressed by glial cells. **b** Expression of the *D. virilis shopper* gene did not cause alterations from the control. **c** *nrv2-Gal4* driven knockdown of *shopper* causes a head bending phenotype. **d** *nrv2-Gal4* driven knockdown of *shopper* in the presence of an *Orco<sup>dsRNA</sup>* dosis control construct shows a similar head bending phenotype. **e** *nrv2-Gal4* driven knockdown of *shopper* in the presence of the *D. virilis shopper* rescue construct shows a wild type locomotion pattern. **f** Quantification of head bending probability for the genotypes indicated. Note: overexpression of the *D. virilis* gene, a mock dsRNA construct as well as the co expression of the *shop<sup>dsRNA</sup>* and the *D. virilis* construct show significant lower head bending probability. See supplementary Table 1 for details on statistics.

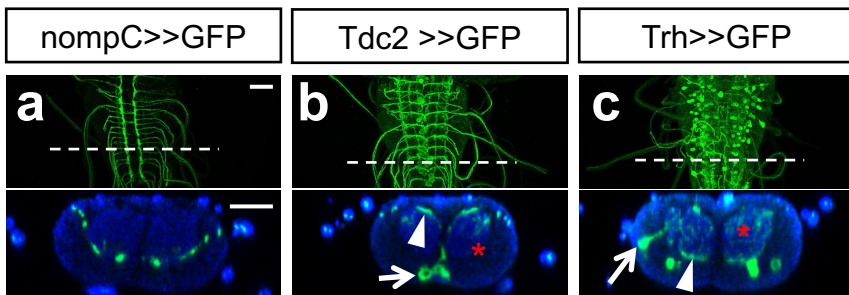

LexA>>GFP<sup>11</sup> | Gal4>>GFP<sup>1-10</sup>

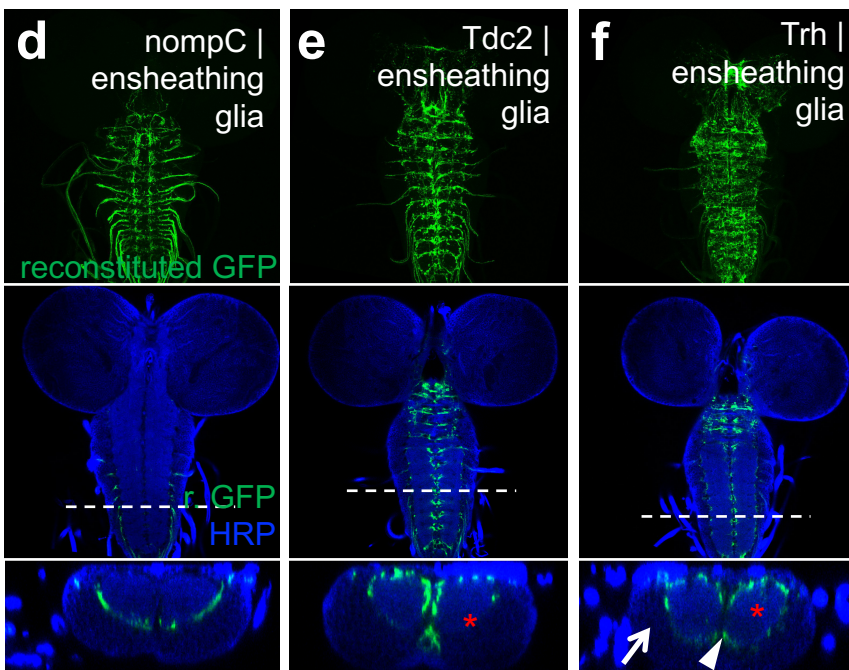

## Supplementary Figure 4 Ensheathing glial cells contact selected axon tracts in the VNC neuropil

**a-c** The expression patterns of several *LexA* drivers are shown. *nompC-LexA* activates expression in sensory neurons projecting to the ventral side of the neuropil. The white dashed lines indicate the position of orthogonal sections shown below. **b** *Tdc2-LexA* activates expression in inter neurons (white arrow) projecting to the dorsal part of the neuropil (white arrow head) with some neurites within the neuropil (asterisk). **c** *Trh-LexA* activates expression in inter neurons (white arrow) projecting throughout the neuropil with many projections within the neuropil (red asterisk). **d** The interface of *nompC-LexA* expressing neurons and ensheathing glial cells is restricted to the ventral neuropil and the nerve roots. **e** The interface of *Tdc2-LexA* expressing neurons and ensheathing glial cells is restricted to the dorsal margin of the neuropil. Note that no reconstruction is found in the neuropil (asterisk). **f** The interface of *Trh-LexA* expressing neurons and ensheathing glial cells is restricted to the margin of the neuropil. Note that no reconstruction is visible in the neuropil (asterisk). Scale bars are 20  $\mu\text{m}$ .



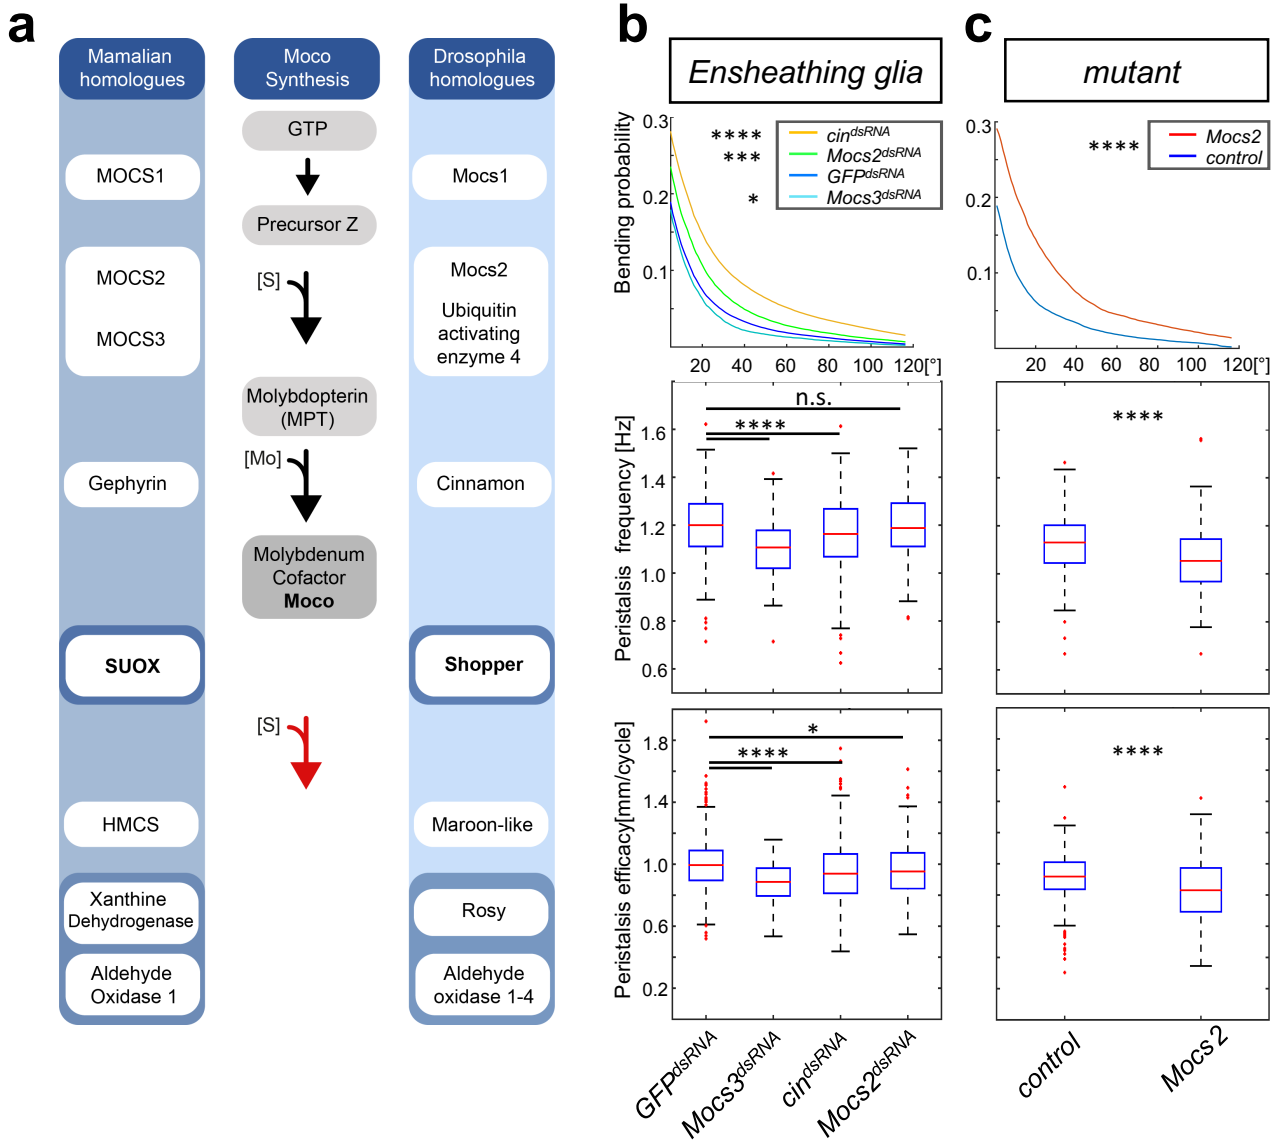

**Supplementary Figure 6 Moco synthesis is required for larval locomotion control**

**a** Comparison between mammalian and *Drosophila* Moco synthesis. The homologous gene names are noted at the relevant biochemical steps. For details see: (Marelja et al. 2018; Schwarz, 2016; Schwarz et al., 2009). **b** Functional analysis of enzymes involved in Moco synthesis. Suppression of *cinnamon* and *Mocs2* specifically in the ensheathing glial cells results in increased head bending. Suppression of *Mocs3* leads to aberrant peristalsis compared to controls. **c** A *Mocs2* mutant [*Mi{MIC}Mocs2MI07531*] compared to wild type controls shows a strongly increased head bending probability as well as reduced peristalsis frequency and efficacy similar to the phenotype observed upon lack of *shopper*. Box plots represent: The first and third quartile, as well as the median. Whiskers contain values within 1.5x of the interquartile range, outliers are red crosses. >600 frames of 50 - 100 larvae; \*p<0.05, \*\*\*p<0.005, \*\*\*\*p<0.001, Wilcoxon rank-sum Test. See supplementary Table 1 for details.



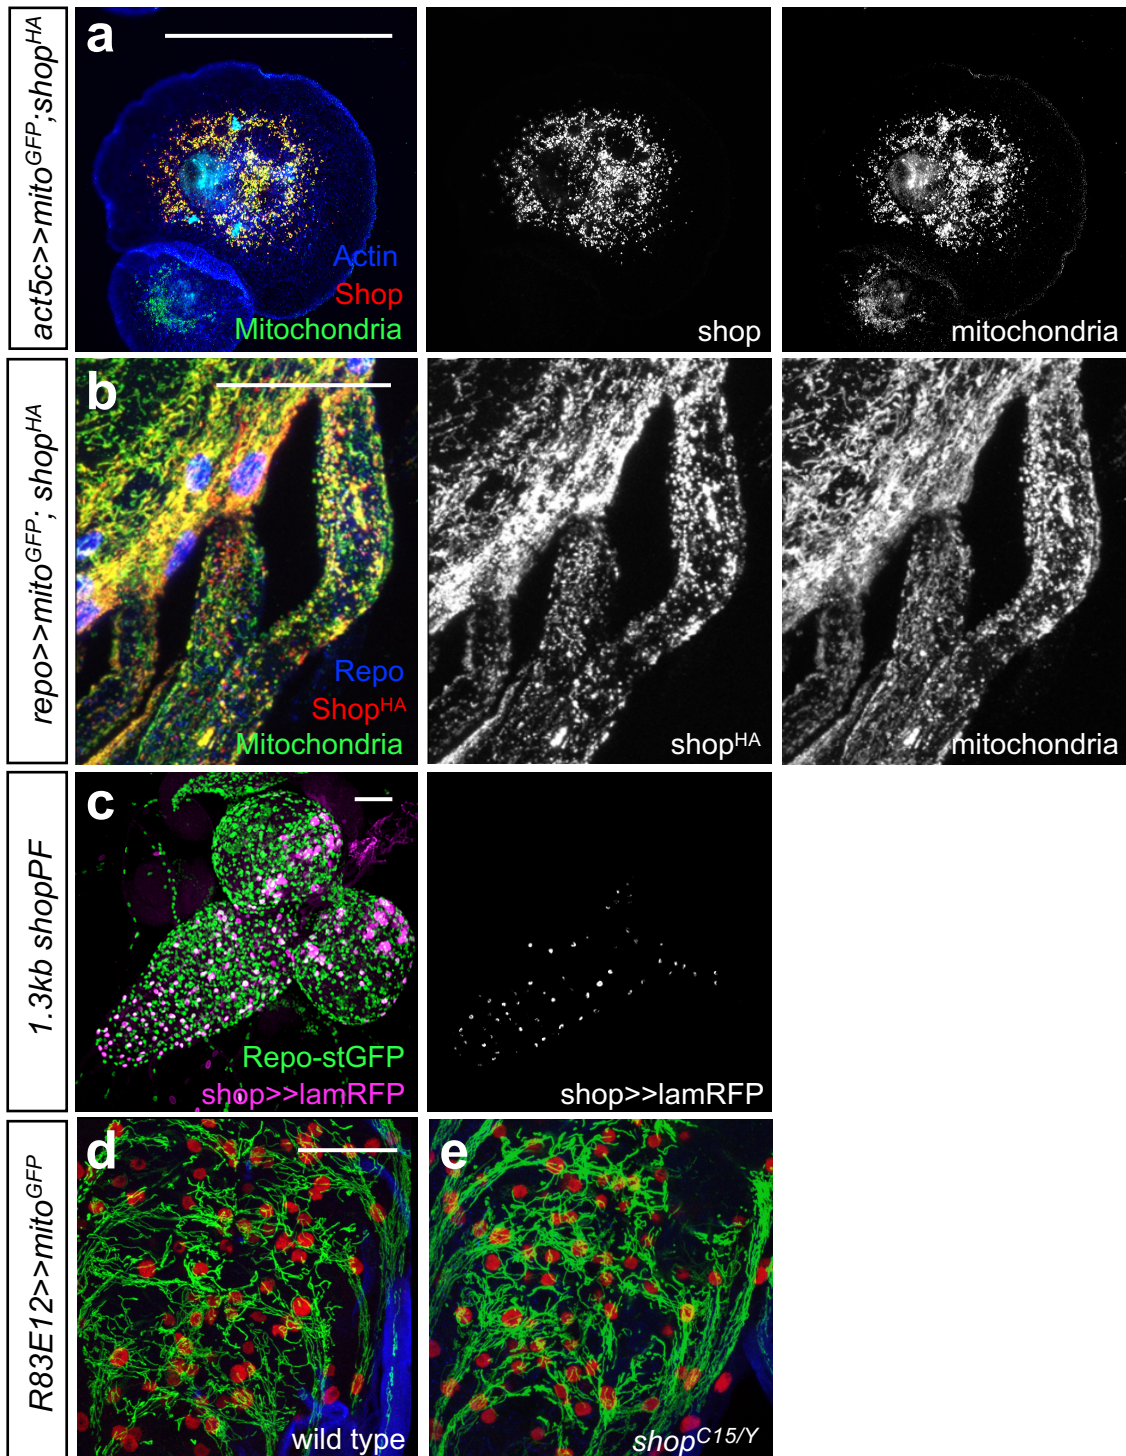

**Supplementary Figure 7 Shopper localizes to glial mitochondria and *shop<sup>C15</sup>* does not alter mitochondrial morphology**

**a** *Drosophila* S2 tissue culture cells transfected with *UAS-mitoGFP* and *UAS-ShopHA*. HA expression (red) colocalizes with MitoGFP (green). Phalloidin staining (blue) indicates the F-actin cytoskeleton. **b** Dorsal view of a ventral nerve cord; genotype (*repo-Gal4*, *UAS-mitoGFP*; *UAS-shopperHA*). ShopperHA expression (red) is found in a dotted or tubular pattern corresponding to the GFP positive mitochondria (green). **c** The *1.3kb shopPF* promoter fragment directs expression of *Gal4* to drive *UAS-lamRFP* in a subset of glial cells that are labelled by a *repo-stingerGFP* expression construct. **d** Third instar larval brain expressing MitoGFP (green) in ensheathing glial cells. Glial nuclei are shown in red, neuronal membranes in blue (HRP staining). **e** *shopper* mutant third instar larval brain expressing MitoGFP (green) in ensheathing glial cells stained in **(d)**. No abnormal mitochondrial phenotype can be detected. Scale bars are 20  $\mu$ m.

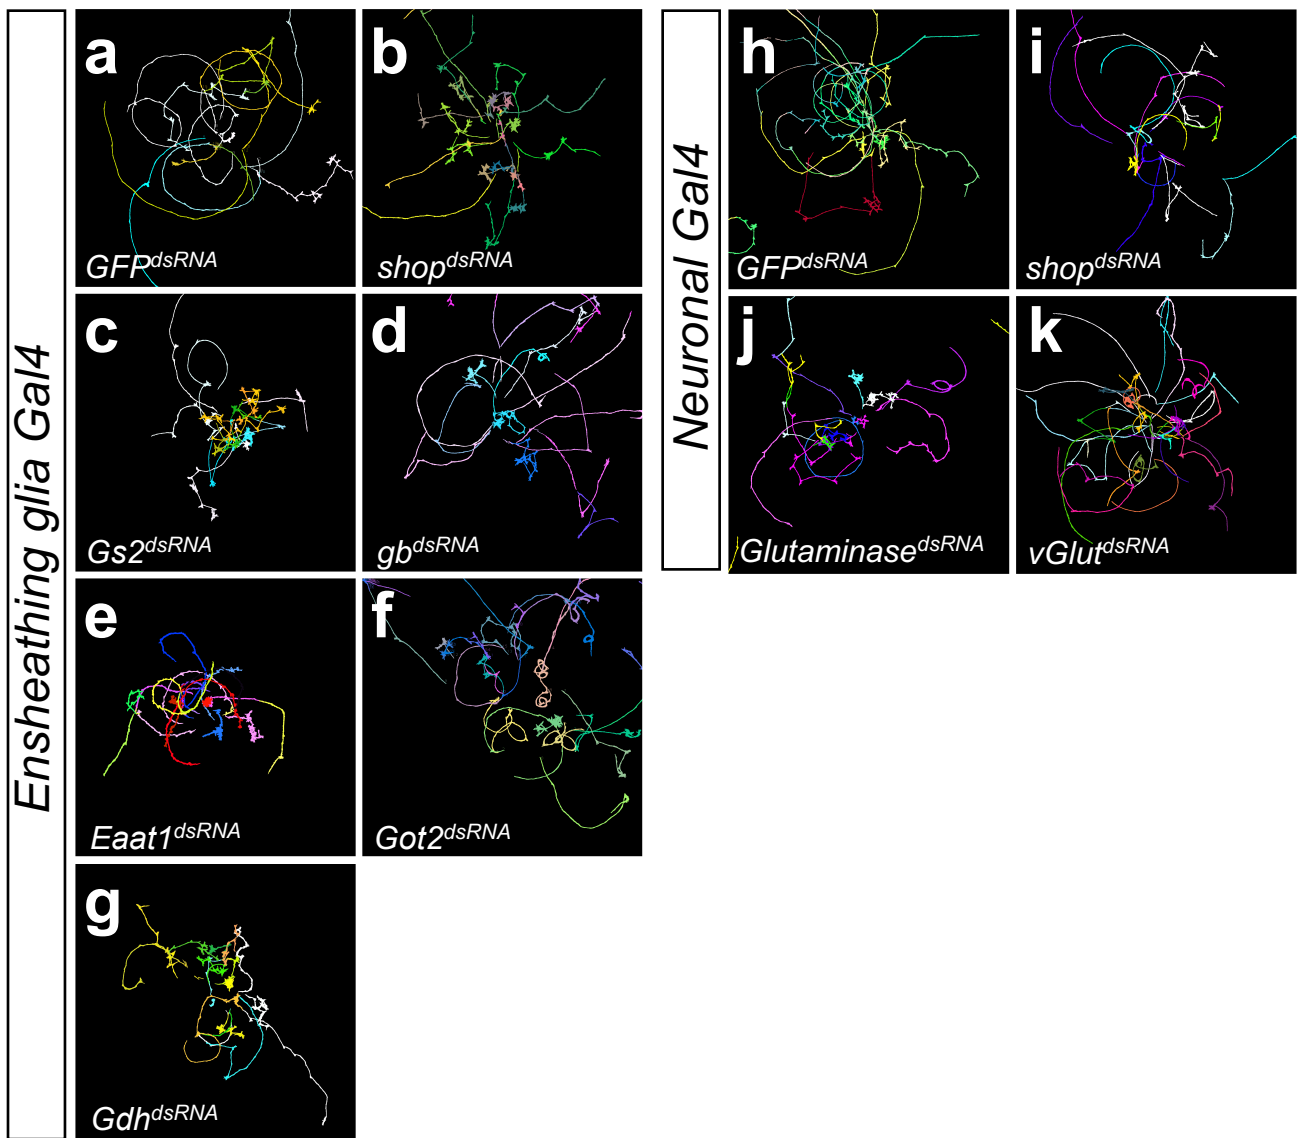

### Supplementary Figure 8 Trajectories of larvae with impaired gene functions affecting the glutamate-glutamine cycle

Trajectories of ~15 larvae with different genes suppressed. The function of the following genes was suppressed in ensheathing glia (*R83E12-Gal4*) by expression of dsRNA constructs: *shopper*, *Eaat1*, *Gs2*, *gb*, *Got2*, and *Gdh*. *GFP<sup>dsRNA</sup>* served as control. The following genes were tested in postmitotic neurons (*nsyb-Gal4*): *Glutaminase*, *vGlut*, and *shopper*. **a** *GFP<sup>dsRNA</sup>* served as control. **b** Ensheathing glial specific knockdown of *shopper* causes aberrant locomotion with strong head bending. Knockdown of **c** *Eaat1*, **d** *Gs2*, **e** *gb*, **f** *Got2*, and **g** *Gdh* causes similar phenotypes with strong head bending. **h-g** Knockdown of genes affecting the glutamate- glutamine cycle in postmitotic neurons using *nsyb-Gal4*. **h** Neuronal expression of *GFP<sup>dsRNA</sup>* caused no abnormal locomotion phenotype. Neuronal knockdown of *shopper* **i** caused no aberrant locomotion. Neuronal knockdown of *Glutaminase* **j** and *vGlut* **k** caused head bending phenotypes comparable to suppression of glutamate-glutamine cycle enzymes in glial cells.

| Figure       | Experiment                                                   | Combination                                                  | Summary | p/value  | statistical test       | n (t: trajectories; rp: run phases) |
|--------------|--------------------------------------------------------------|--------------------------------------------------------------|---------|----------|------------------------|-------------------------------------|
| 1,c          | panglial bending probability                                 | repo>GFPdsRNA vs. repo>shopdsRNA                             | ****    | 6,90E-06 | Wilcoxon rank-sum test | 183; 190 t                          |
| 1,d          | panglial Distance to Origin                                  | repo>GFPdsRNA vs. repo>shopdsRNA                             | ****    | 8,60E-15 | Wilcoxon rank-sum test | 183; 190 t                          |
| 1,e          | panglial peristalsis frequency                               | repo>GFPdsRNA vs. repo>shopdsRNA                             | ****    | 1,12E-13 | Wilcoxon rank-sum test | 483; 524 rp                         |
| 1,f          | panglial peristalsis efficiency                              | repo>GFPdsRNA vs. repo>shopdsRNA                             | ****    | 7,52E-07 | Wilcoxon rank-sum test | 483; 524 rp                         |
| 1,k          | ensheathing glia bending probability                         | R83E12>GFPdsRNA vs. R83E12>shopdsRNA                         | ****    | 2,02E-06 | Wilcoxon rank-sum test | 329; 369 t                          |
| 3,b          | ensheathing glia cycle frequency                             | R83E12>GFPdsRNA vs. R83E12>shopdsRNA                         | *       | 0,0108   | Mann-Whitney Rank Sum  | 115; 11 animals                     |
|              | ensheathing glia burst frequency                             | R83E12>GFPdsRNA vs. R83E12>shopdsRNA                         | n.s.    | 0,1090   | Mann-Whitney Rank Sum  | 115; 11 animals                     |
|              | ensheathing glia interburst duration                         | R83E12>GFPdsRNA vs. R83E12>shopdsRNA                         | n.s.    | 0,0870   | Mann-Whitney Rank Sum  | 115; 11 animals                     |
| 3,d          | ensheathing glia cycle phase analysis                        | R83E12>GFPdsRNA vs. R83E12>shopdsRNA                         | *       | 0,0380   | two tailed t-test      | 12; 7 animals                       |
| 4,c          | sulfite oxidase activity                                     | w1118 vs. act>OrcodsRNA                                      | n.s.    | 0,2398   | two tailed t-test      | 3 measurements 3 experiments        |
|              |                                                              | act>OrcodsRNA vs. act>shop dsRNA                             | ***     | 0,0018   |                        | 3 measurements 3 experiments        |
|              |                                                              | w1118 vs. Df(1)shopper+4                                     | ***     | 0,0022   |                        | 3 measurements 3 experiments        |
|              |                                                              | act>OrcodsRNA vs. sopsdsRNA; shopD.v.                        | **      | 0,0061   |                        | 3 measurements 3 experiments        |
|              |                                                              | w1118 vs. act>shopHA                                         | *       | 0,0236   |                        | 3 measurements 3 experiments        |
| 4,d          | sulfite levels                                               | w1118 vs. act>OrcodsRNA                                      | n.s.    | 0,0904   | two tailed t-test      | 3 measurements 3 experiments        |
|              |                                                              | act>OrcodsRNA vs. act>shop dsRNA1                            | ****    | 0,0000   |                        | 3 measurements 3 experiments        |
|              |                                                              | act>OrcodsRNA vs. act>shop dsRNA2                            | ****    | 0,0000   |                        | 3 measurements 3 experiments        |
|              |                                                              | act>OrcodsRNA vs. sopsdsRNA; shopD.v.                        | n.s.    | 0,1255   |                        | 3 measurements 3 experiments        |
|              |                                                              | w1118 vs. act>shopHA                                         | *       | 0,0162   |                        | 3 measurements 3 experiments        |
| 4g           | shopper mutant bending probability                           | CRISPRcontrol vs. shopperC15                                 | ****    | 6,34E-12 | Wilcoxon rank-sum test | 162; 184 t                          |
| 6a left      | ensheathing glia glutamate metabolism bending probability    | R83E12>GFPdsRNA vs. R83E12>shopdsRNA                         | ****    | 2,02E-06 | Wilcoxon rank-sum test | 329; 369 t                          |
|              |                                                              | R83E12>GFPdsRNA vs. R83E12>EAAT1dsRNA                        | ****    | 2,58E-18 |                        | 329; 45 t                           |
|              |                                                              | R83E12>GFPdsRNA vs. R83E12>GDHdsRNA                          | ****    | 4,50E-13 |                        | 329; 71 t                           |
|              |                                                              | R83E12>GFPdsRNA vs. R83E12>GS2dsRNA                          | ****    | 7,09E-14 |                        | 329; 212 t                          |
|              |                                                              | R83E12>GFPdsRNA vs. R83E12>Got2dsRNA                         | ****    | 5,30E-07 |                        | 329; 137 t                          |
| 6a right     | pan neuronal glutamate metabolism bending probability        | R83E12>GFPdsRNA vs. R83E12>gldsRNA                           | ****    | 5,98E-07 | Wilcoxon rank-sum test | 329; 102 t                          |
|              |                                                              | nsyb>GFPdsRNA vs. nsyb>shopdsRNA                             | n.s.    | 0,1736   |                        | 378; 234 t                          |
|              |                                                              | nsyb>GFPdsRNA vs. nsyb>GlutaminasesdsRNA                     | ****    | 0,0001   |                        | 378; 71 t                           |
|              |                                                              | nsyb>GFPdsRNA vs. nsyb>vGlutdsRNA                            | n.s.    | 0,1657   |                        | 378; 340 t                          |
|              |                                                              | R83E12>GFPdsRNA vs. R83E12>shopdsRNA                         | *       | 0,0353   |                        | 329; 369 t                          |
| 6b left      | ensheathing glia glutamate metabolism distance to origin     | R83E12>GFPdsRNA vs. R83E12>EAAT1dsRNA                        | ****    | 8,29E-11 | Wilcoxon rank-sum test | 329; 45 t                           |
|              |                                                              | R83E12>GFPdsRNA vs. R83E12>GDHdsRNA                          | ****    | 7,72E-11 |                        | 329; 71 t                           |
|              |                                                              | R83E12>GFPdsRNA vs. R83E12>GS2dsRNA                          | ****    | 2,88E-05 |                        | 329; 212 t                          |
|              |                                                              | R83E12>GFPdsRNA vs. R83E12>Got2dsRNA                         | n.s.    | 0,1332   |                        | 329; 137 t                          |
|              |                                                              | R83E12>GFPdsRNA vs. R83E12>gldsRNA                           | n.s.    | 0,1240   |                        | 329; 102 t                          |
| 6b right     | pan neuronal glutamate metabolism distance to origin         | nsyb>GFPdsRNA vs. nsyb>shopdsRNA                             | n.s.    | 0,1020   | Wilcoxon rank-sum test | 378; 234 t                          |
|              |                                                              | nsyb>GFPdsRNA vs. nsyb>GlutaminasesdsRNA                     | *       | 0,0194   |                        | 378; 71 t                           |
|              |                                                              | nsyb>GFPdsRNA vs. nsyb>vGlutdsRNA                            | **      | 0,0054   |                        | 378; 340 t                          |
|              |                                                              | R83E12>GFPdsRNA vs. R83E12>shopdsRNA                         | ****    | 2,62E-18 |                        | 982; 1097 rp                        |
|              |                                                              | R83E12>GFPdsRNA vs. R83E12>EAAT1dsRNA                        | ****    | 2,47E-35 |                        | 982; 232 rp                         |
| 6c left      | ensheathing glia glutamate metabolism peristalsis frequency  | R83E12>GFPdsRNA vs. R83E12>GDHdsRNA                          | ****    | 3,52E-18 | Wilcoxon rank-sum test | 982; 351 rp                         |
|              |                                                              | R83E12>GFPdsRNA vs. R83E12>GS2dsRNA                          | ****    | 2,64E-05 |                        | 982; 651 rp                         |
|              |                                                              | R83E12>GFPdsRNA vs. R83E12>Got2dsRNA                         | ****    | 1,86E-11 |                        | 982; 137 rp                         |
|              |                                                              | R83E12>GFPdsRNA vs. R83E12>gldsRNA                           | **      | 0,0073   |                        | 982; 306 rp                         |
|              |                                                              | nsyb>GFPdsRNA vs. nsyb>shopdsRNA                             | n.s.    | 0,3468   |                        | 857; 428 rp                         |
| 6c right     | pan neuronal glutamate metabolism peristalsis frequency      | nsyb>GFPdsRNA vs. nsyb>GlutaminasesdsRNA                     | ****    | 3,22E-11 | Wilcoxon rank-sum test | 857; 222 rp                         |
|              |                                                              | nsyb>GFPdsRNA vs. nsyb>vGlutdsRNA                            | ****    | 3,16E-08 |                        | 857; 764 rp                         |
|              |                                                              | R83E12>GFPdsRNA vs. R83E12>shopdsRNA                         | ****    | 3,02E-09 |                        | 982; 1097 rp                        |
|              |                                                              | R83E12>GFPdsRNA vs. R83E12>EAAT1dsRNA                        | ****    | 7,36E-26 |                        | 982; 232 rp                         |
|              |                                                              | R83E12>GFPdsRNA vs. R83E12>GDHdsRNA                          | ****    | 1,08E-43 |                        | 982; 351 rp                         |
| 6d left      | ensheathing glia glutamate metabolism peristalsis efficacy   | R83E12>GFPdsRNA vs. R83E12>GS2dsRNA                          | n.s.    | 0,1479   | Wilcoxon rank-sum test | 982; 651 rp                         |
|              |                                                              | R83E12>GFPdsRNA vs. R83E12>Got2dsRNA                         | ****    | 0,0002   |                        | 982; 137 rp                         |
|              |                                                              | R83E12>GFPdsRNA vs. R83E12>gldsRNA                           | n.s.    | 0,5328   |                        | 982; 306 rp                         |
|              |                                                              | nsyb>GFPdsRNA vs. nsyb>shopdsRNA                             | *       | 0,0254   |                        | 857; 428 rp                         |
|              |                                                              | nsyb>GFPdsRNA vs. nsyb>GlutaminasesdsRNA                     | ***     | 0,0039   |                        | 857; 222 rp                         |
| 6d right     | pan neuronal glutamate metabolism peristalsis efficiency     | nsyb>GFPdsRNA vs. nsyb>vGlutdsRNA                            | ****    | 2,68E-05 | Wilcoxon rank-sum test | 857; 764 rp                         |
|              |                                                              | shopC15; act> w1118 vs. shopC15; act> GDH                    | ****    | 0,0001   |                        | 140; 223 rp                         |
|              |                                                              | shopC15; act> w1118 vs. shopC15; act> GDH                    | n.s.    | 0,0576   |                        | 140; 223 rp                         |
|              |                                                              | shopC15; act> w1118 vs. shopC15; act> GDH                    | ****    | 0,0007   |                        | 16; 29 t                            |
|              |                                                              | shopC15; R83E12> w1118 vs. shopC15; R83E12> GDH              | ****    | 8,39E-09 |                        | 245; 445 rp                         |
| 7,b middle   | ensheathing glial GDH expression rescue peristalsis efficacy | shopC15; R83E12> w1118 vs. shopC15; R83E12> GDH              | n.s.    | 0,7976   | Wilcoxon rank-sum test | 245; 445 rp                         |
|              |                                                              | shopC15; R83E12> w1118 vs. shopC15; R83E12> GDH              | *       | 0,0115   |                        | 26; 46 t                            |
|              |                                                              | shopC15; R55B12> w1118 vs. shopC15; R55B12> GDH              | n.s.    | 0,1332   |                        | 171; 116 rp                         |
| 7,b lower    | Cortex glial GDH expression rescue peristalsis efficacy      | shopC15; R55B12> w1118 vs. shopC15; R55B12> GDH              | *       | 0,0424   | Wilcoxon rank-sum test | 171; 116 rp                         |
|              |                                                              | shopC15; R55B12> w1118 vs. shopC15; R55B12> GDH              | n.s.    | 0,9727   |                        | 21; 20 t                            |
|              |                                                              | shopC15; R55B12> w1118 vs. shopC15; R55B12> GDH              | n.s.    | 0,9727   |                        | 21; 20 t                            |
| S2,e         | Cortex glia bending probability                              | R55B12 > GFPdsRNA vs. R55B12 > shopdsRNA                     | n.s.    | 0,7834   | Wilcoxon rank-sum test | 253; 206 t                          |
| S2,h         | Astrocyte like glia bending probability                      | alm > GFPdsRNA vs. alm > shopdsRNA                           | n.s.    | 0,5384   | Wilcoxon rank-sum test | 116; 145 t                          |
| S2,i         | R83E12 in 86Fb bending probability                           | R83B12_86Fb > GFPdsRNA vs. R83E12_86Fb > shopdsRNA           | ****    | 2,70E-21 | Wilcoxon rank-sum test | 87; 125 t                           |
| S2,j         | R83E12 in 86Fb temperature dependency                        | R83B12_86Fb > shopdsRNA_19C vs. R83E12_86Fb_25 vs. shopdsRNA | ****    | 6,98E-21 | Wilcoxon rank-sum test | 74; 125 t                           |
| S2,j         | R25H07 in attP2 bending probability                          | R25H07_attP2 > GFPdsRNA vs. R25H07_attP2 > shopdsRNA         | n.s.    | 0,6021   | Wilcoxon rank-sum test | 87; 79 t                            |
|              |                                                              | R25H07_attP2 > GFPdsRNA vs. R25H07_attP2 > shopdsRNA         | n.s.    | 0,7752   |                        | 288; 459 rp                         |
|              |                                                              | R25H07_attP2 > GFPdsRNA vs. R25H07_attP2 > shopdsRNA         | ****    | 3,47E-08 |                        | 288; 459 rp                         |
| S3,f         | Interspecies Rescue bending probability                      | nrv2 > OrcodsRNA vs. nrv2 > shopdsRNA                        | ****    | 2,27E-12 | Wilcoxon rank-sum test | 224; 263 t                          |
|              |                                                              | nrv2 > shopdsRNA vs. nrv2 > shopdsRNA, shopD.v.              | ****    | 6,64E-08 |                        | 224; 350 t                          |
|              |                                                              | nrv2 > shopD.v. vs. nrv2 > shopdsRNA, shopD.v.               | n.s.    | 0,6296   |                        | 171; 350 t                          |
|              |                                                              | nrv2 > OrcodsRNA vs. nrv2 > shopdsRNA, orcodsRNA             | ****    | 1,75E-08 |                        | 224; 41 t                           |
|              |                                                              | nrv2 > OrcodsRNA vs. nrv2 > shopD.v.                         | n.s.    | 0,0882   |                        | 224; 171 t                          |
|              |                                                              | nrv2 > OrcodsRNA vs. nrv2 > shopdsRNA; shopD.v.              | *       | 0,0273   |                        | 224; 350 t                          |
|              |                                                              | R83B12 > GFPdsRNA vs. R83E12 > Mocs3dsRNA                    | *       | 0,0173   |                        | 150; 40 t                           |
| S6, b upper  | Moco synthesis ensheathing glia bending probability          | R83B12 > GFPdsRNA vs. R83E12 > cindsRNA                      | ***     | 0,0039   | Wilcoxon rank-sum test | 150; 183 t                          |
| S6, c upper  | Moco synthesis in mutant bending probability                 | w1118 vs. mocs2                                              | ****    | 3,80E-11 | Wilcoxon rank-sum test | 167; 55 t                           |
| S6, b middle | Moco synthesis ensheathing glia peristalsis frequency        | R83B12 > GFPdsRNA vs. R83E12 > Mocs3dsRNA                    | ****    | 4,13E-13 | Wilcoxon rank-sum test | 467; 113 rp                         |
|              |                                                              | R83B12 > GFPdsRNA vs. R83E12 > Mocs2dsRNA                    | n.s.    | 0,9030   |                        | 467; 748 rp                         |
|              |                                                              | R83B12 > GFPdsRNA vs. R83E12 > cindsRNA                      | ****    | 0,0001   |                        | 467; 130 rp                         |
| S6, c middle | Moco synthesis in mutant peristalsis frequency               | w1118 vs. mocs2                                              | ****    | 2,37E-07 | Wilcoxon rank-sum test | 327; 162 rp                         |
| S6, b lower  | Moco synthesis ensheathing glia peristalsis efficacy         | R83B12 > GFPdsRNA vs. R83E12 > Mocs3dsRNA                    | ****    | 4,86E-12 | Wilcoxon rank-sum test | 467; 113 rp                         |
|              |                                                              | R83B12 > GFPdsRNA vs. R83E12 > Mocs2dsRNA                    | *       | 0,0231   |                        | 467; 748 rp                         |
|              |                                                              | R83B12 > GFPdsRNA vs. R83E12 > cindsRNA                      | ****    | 9,46E-07 |                        | 467; 130 rp                         |
| S6, c lower  | Moco synthesis in mutant peristalsis efficacy                | w1118 vs. mocs2                                              | ****    | 1,41E-05 | Wilcoxon rank-sum test | 327; 162 rp                         |

**Supplementary Table 1 Statistical analyses**

Summary of all statistical analyses conducted in this paper, grouped according to the figures. The genotypes used in the different experiments, the n-numbers, the statistical tests, and the p-values are indicated. In general, asterisk indicate p-values of: \* $<0.05$ , \*\* $<0.01$ , \*\*\* $<0.005$ , \*\*\*\* $<0.001$ .

**Supplementary References:**

Schwarz, Günter, 2016. Molybdenum cofactor and human disease. *Current Opinion in Chemical Biology* 31, 179–187. doi:10.1016/j.cbpa.2016.03.016

Schwarz, Günter, Mendel, R.R., Ribbe, M.W., 2009. Molybdenum cofactors, enzymes and pathways. *Nature* 460, 839–847. doi:10.1038/nature08302

Marelja, Z., Leimkühler, S., Missirlis, F., 2018. Iron Sulfur and Molybdenum Cofactor Enzymes Regulate the *Drosophila* Life Cycle by Controlling Cell Metabolism. *Frontiers in physiology* 9, 50. doi:10.3389/fphys.2018.00050
